# Supplementary material for: Antenatal dexamethasone treatment transiently alters diastolic function in the mouse fetal heart
Source: PubMed Central journal article supplement (PMC6541236; doi:10.1530/joe-18-0666), 2019-04-23

# Supplementary Figure 4

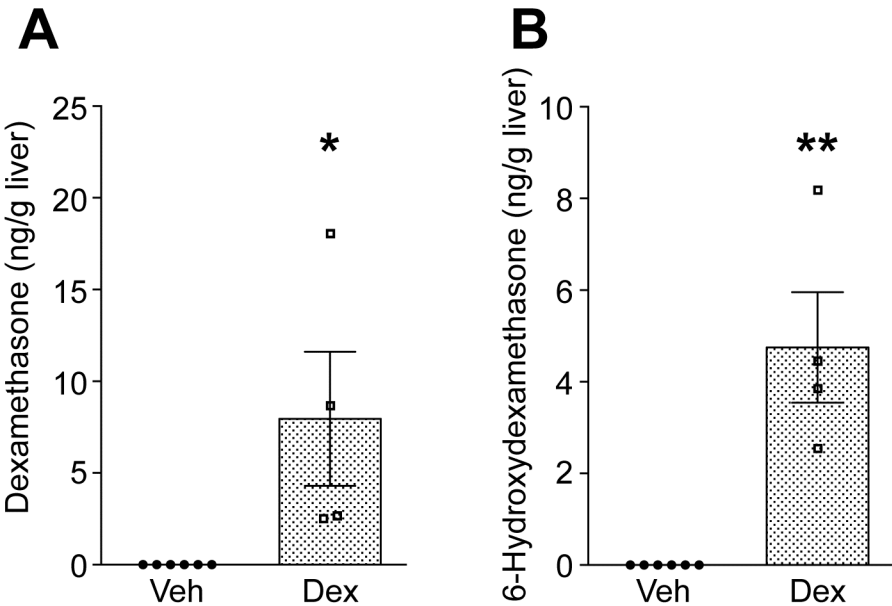

Supplement: supplementary_figure_4.pdf [file supplementary_figure_4.pdf]
