# Supplementary material for: Antenatal dexamethasone treatment transiently alters diastolic function in the mouse fetal heart
Source: PubMed Central journal article supplement (PMC6541236; doi:10.1530/joe-18-0666), 2019-04-23
Supplement: supplementary_table_1.pdf [file supplementary_table_1.pdf]

1 **Supplementary Table 1. Primer sequences and the corresponding probes used for qRT-PCR analysis of mRNA.**

2 Sequences of forward and reverse primers and the Universal Probe Library probe number used in qRT-PCR assays to measure levels of specific  
3 mRNAs.

4

| mRNA           | Sequence 5'-3'           |                       | Probe |
|----------------|--------------------------|-----------------------|-------|
|                | Forward                  | Reverse               |       |
| <i>Actb</i>    | CTAAGGCCAACCGTGAAAAG     | ACCAGAGGCATACAGGGACA  | 64    |
| <i>Atp2a2</i>  | TCGACCAGTCAATTCTTACAGG   | CAGGGACAGGGTCAGTATGC  | 94    |
| <i>Cacna1c</i> | CCTGCACAAGGGCTCTTTC      | AGATGAGGGACACGCTAACC  | 62    |
| <i>Fkbp5</i>   | AAACGAAGGAGCAACGGTAA     | TCAAATGTCCTTCCACCACA  | 97    |
| <i>Hprt</i>    | TCCTCCTCAGACCGCTTTT      | CCTGGTTCATCATCGCTAATC | 95    |
| <i>Kcnj12</i>  | GGCCTAGACCGTATCTTCCTG    | TGGCCTCATCAATCTCGTG   | 9     |
| <i>Nr3c1</i>   | CAAAGATTGCAGGTATCCTATGAA | CTTGGCTCTTCAGACCTTCC  | 91    |
| <i>Ryr2</i>    | TTCAACACGCTCACGGAGTA     | TGCCAGGCTCTGCTGATT    | 81    |
| <i>Slc8a1</i>  | GTCAGCCTTCAGAGCTGGTC     | GACTTCCAAGTCTCCAACC   | 42    |
| <i>Tbp</i>     | GGGAGAATCATGGACCAGAA     | GATGGGAATTCCAGGAGTCA  | 97    |

5

6
