# Supplementary material for: Antenatal dexamethasone treatment transiently alters diastolic function in the mouse fetal heart
Source: PubMed Central journal article supplement (PMC6541236; doi:10.1530/joe-18-0666), 2019-04-23
Supplement: supplementary_table_2.pdf [file supplementary_table_2.pdf]

**Supplementary Table 2. Echocardiography parameters measured in E15.5 and E17.5 fetal mice.**

Pregnant dams were administered dexamethasone (Dex, 100µg/kg/day) or vehicle (Veh) in their drinking water from E12.5 to E15.5. Fetal cardiac function was assessed at E15.5 or E17.5 using a Visualsonics Vevo 770 High Resolution Ultrasound Scanner using Doppler mode. IVCT: isovolumetric contraction time, IVRT: isovolumetric relaxation time, ET: ejection time, MPI: myocardial performance index, calculated as (IVCT+IVRT)/ET, HR: heart rate measured as beats per minute (bpm), E/A: E/A wave ratio, DT: deceleration time. Data are means ± SEM and were analysed by 2-way ANOVA, with post-hoc Bonferroni tests. P values are stated where p=0.1 to 0.05. Significantly different compared to same treatment and genotype at E15.5, p<0.05, p<0.001, n=7-29 fetuses, from 5-6 litters per group.

| <b>E15.5</b>     |                       |                      |                       |                      |                  |                 |                    |  |  |
|------------------|-----------------------|----------------------|-----------------------|----------------------|------------------|-----------------|--------------------|--|--|
| <b>Parameter</b> | <b>Veh</b>            |                      | <b>Dex</b>            |                      | <b>ANOVA</b>     |                 |                    |  |  |
|                  | <b>Control (n=15)</b> | <b>SMGRKO (n=24)</b> | <b>Control (n=14)</b> | <b>SMGRKO (n=28)</b> | <b>Treatment</b> | <b>Genotype</b> | <b>Interaction</b> |  |  |
| IVCT (ms)        | 27.36 1.62            | 27.97 1.11           | 32.71 2.14            | 29.09 1.77           | p=0.068          | NS              | NS                 |  |  |
| IVRT (ms)        | 40.92 1.48            | 42.66 1.33           | 41.43 1.15            | 40.67 1.09           | NS               | NS              | NS                 |  |  |
| ET (ms)          | 109.44 4.44           | 106.60 2.41          | 114.08 2.86           | 106.22 2.65          | NS               | p=0.090         | NS                 |  |  |
| MPI              | 0.64 0.04             | 0.66 0.02            | 0.65 0.03             | 0.66 0.03            | NS               | NS              | NS                 |  |  |
| E/A              | 0.33 0.03             | 0.34 0.02            | 0.36 0.02             | 0.32 0.02            | NS               | NS              | NS                 |  |  |
| DT (ms)          | 56.34 3.68            | 48.87 2.91           | 61.99 5.17            | 53.97 3.52           | NS               | p=0.054         | NS                 |  |  |
| HR (bpm)         | 211.1 6.6             | 216.7 4.3            | 198.9 6.9             | 214.4 5.9            | NS               | p=0.092         | NS                 |  |  |
| <b>E17.5</b>     |                       |                      |                       |                      |                  |                 |                    |  |  |
|                  | <b>Veh</b>            |                      | <b>Dex</b>            |                      | <b>ANOVA</b>     |                 |                    |  |  |
|                  | <b>Control (n=18)</b> | <b>SMGRKO (n=23)</b> | <b>Control (n=8)</b>  | <b>SMGRKO (n=20)</b> | <b>Treatment</b> | <b>Genotype</b> | <b>Interaction</b> |  |  |
| IVCT (ms)        | 29.58 1.91            | 31.09 2.03           | 26.62 1.92            | 29.43 1.26           | NS               | NS              | NS                 |  |  |
| IVRT (ms)        | 35.59 0.98            | 33.90 0.85           | 36.77 1.06            | 33.94 1.06           | NS               | p<0.05          | NS                 |  |  |
| ET (ms)          | 99.20 2.06            | 104.31 2.20          | 102.45 2.86           | 99.02 2.03           | NS               | NS              | p=0.091            |  |  |
| MPI              | 0.68 0.03             | 0.61 0.02            | 0.63 0.04             | 0.61 0.02            | NS               | NS              | NS                 |  |  |
| E/A              | 0.47 0.03             | 0.46 0.02            | 0.45 0.02             | 0.42 0.02            | NS               | NS              | NS                 |  |  |
| DT (ms)          | 46.35 2.31            | 44.28 2.37           | 49.35 3.15            | 44.85 2.94           | NS               | NS              | NS                 |  |  |
| HR (bpm)         | 223.52 6.47           | 224.16 5.37          | 215.38 8.87           | 231.38 6.54          | NS               | NS              | NS                 |  |  |
